# Supplementary material for: Alkaline earth metal stannate TSnO3 (T = Ca and Sr) entrapped functionalized carbon nanofiber composites: active electrocatalysts for the determination of hydroxychloroquine in environmental samples
Source: Royal Society of Chemistry journal article supplement (doi:10.1039/d3en00228d), 2023-01-01
Supplement: d3en00228d1.pdf [file d3en00228d1.pdf]

**Supporting Information**

**Alkaline earth metal stannate  $\text{TSnO}_3$  (T = Ca and Sr) entrapped functionalized carbon nanofiber composites: active electrocatalysts for the determination of hydroxychloroquine in environmental samples**

*Abhikha Sherlin V<sup>a</sup>, Balasubramanian Sriram<sup>b</sup>, Sea-Fue Wang<sup>b</sup>, Megha Maria Stanley<sup>a</sup>, Mary George<sup>a,\*</sup>*

*<sup>a</sup>Department of Chemistry, Stella Maris College, Affiliated to the University of Madras, Chennai, Tamil Nadu 600086, India.*

*<sup>b</sup>Department of Materials and Mineral Resources Engineering, National Taipei University of Technology, Taipei 106, Taiwan.*

**Corresponding author:**

**E-mail:** [maryge@gmail.com](mailto:maryge@gmail.com)

**Materials Characterizations:** Phase configuration is identified using Bruker D2 Phaser advance instrument X-ray diffractometer through  $\text{CuK}\alpha$  radiation ( $\lambda = 1.5405\text{\AA}$ ) whereas crystal structure is determined using Vesta software. Perkin Elmer spectrometer is employed to record Fourier transform infrared spectra in the range of  $400\text{-}4000\text{ cm}^{-1}$ . The microstructure and the elemental composition of the as-prepared materials were studied employing a high resolution (HR) transmission electron microscope (TEM) (JEOL JEM-2100F (HR)) operating at 200 kV and by energy-dispersive X-ray spectroscopy using EDAX AMETEK Inc., DigitalMicrograph® software. X-ray photoelectron spectroscopy ESCA/Auger Laboratory is applied to quantitatively analyse the chemical composition of the materials while the electrochemical properties are explored using electrochemical impedance spectroscopy (EIS) through Autolab (PGSTAT204). CHI 1211c electrocatalytic workstation is functional to carry out the electrochemical measurements like cyclic voltammetry (CV) and Amperometric (i-t) in a conventional three electrode cell. Here, the GCE (geometrical surface area =  $0.071\text{ cm}^2$ ), saturated Ag|AgCl and Pt wire are active as working, reference and counter electrodes, respectively.

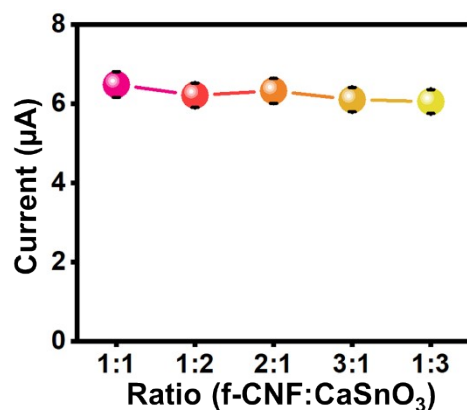

Figure S1. Composite preparation

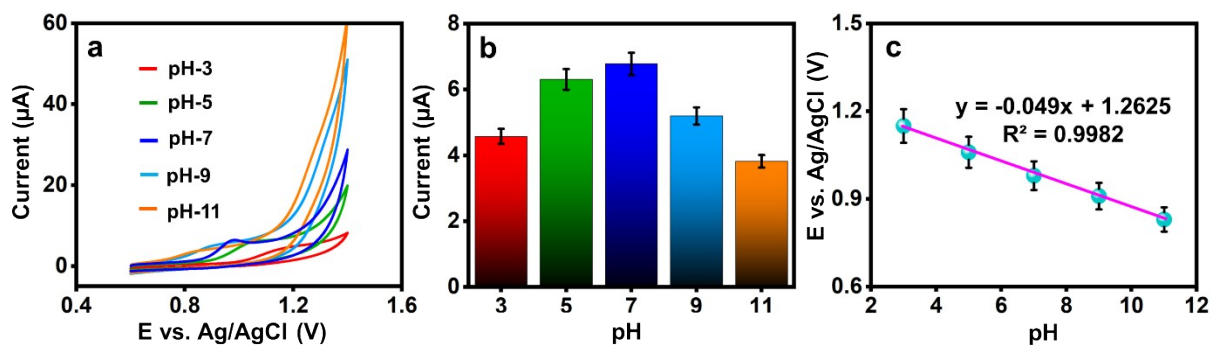

**Figure S1. (a-c)** Effect on various supporting electrolyte in the presence of HCQ at  $\text{CaSnO}_3/\text{f-CNF}$ .

**Table S1.** An overview on recently reported nanomaterial-based electrochemical methods for the determination of HCQ.

| <b>Materials</b>                   | <b>Method</b>     | <b>Linear ranges<br/>(<math>\mu\text{M}</math>)</b> | <b>LOD<br/>(<math>\mu\text{M}</math>)</b> | <b>Real samples</b>                               | <b>Ref.</b>      |
|------------------------------------|-------------------|-----------------------------------------------------|-------------------------------------------|---------------------------------------------------|------------------|
| MWCNTs                             | AdSDPV            | 0.57–100                                            | 0.006                                     | pharmaceutical formulations and biological fluids | S1               |
| VS <sub>2</sub> QD/N, S@ GNA/CNTs  | DPV               | 0.84–22.5                                           | 0.277                                     | biological fluids                                 | S2               |
| PMPDA-SAM/GCE                      | DPV               | 0.05–12.8<br>12.3–111                               | 0.00451                                   | human body fluids                                 | S3               |
| BDDE                               | SWV               | 0.1–1.9                                             | 0.06                                      | synthetic urine samples                           | S4               |
| Schiff's base modified GCE         | DPV               | 0.007–11.9                                          | 0.0047                                    | human blood serum                                 | S5               |
| $\beta$ -CD-AuNP                   | DPV               | 0.01–0.05                                           | 0.00261                                   | pharmaceutical samples                            | S6               |
| Cathodic treated boron diamond     | SWV               | 0.29–5.66                                           | 0.18                                      | pharmaceutical (tablets)                          | S7               |
| NaNbO <sub>3</sub> @f-CNF/GCE      | <i>i-t</i>        | 0.006–35                                            | 0.007                                     | Water bodies                                      | S8               |
| <b>CaSnO<sub>3</sub>@f-CNF/GCE</b> | <b><i>i-t</i></b> | <b>0.001–129.5</b>                                  | <b>0.0045</b>                             | <b>Water bodies</b>                               | <b>This work</b> |

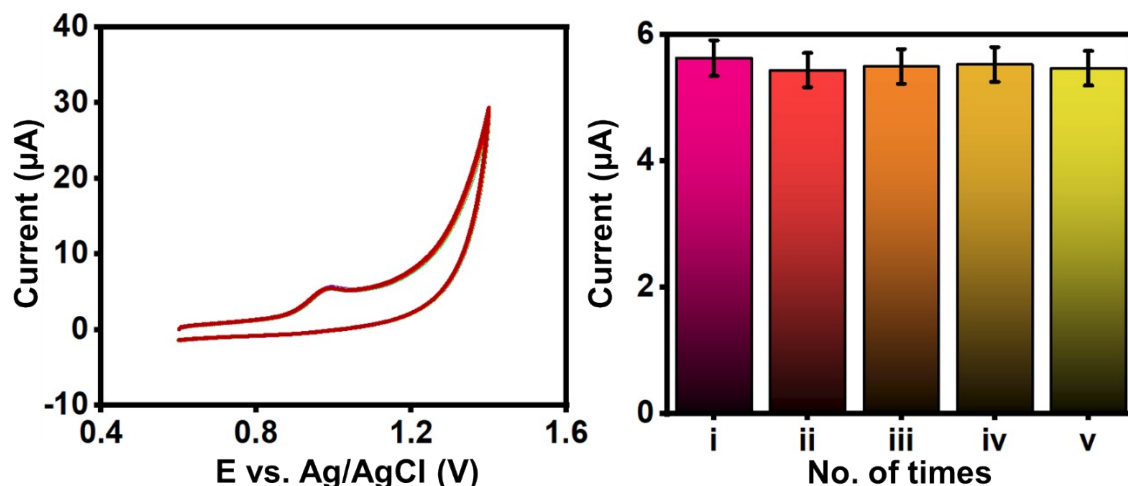

**Figure S2.** Repeatability analysis of  $\text{CaSnO}_3/\text{f-CNF}$  with the presence of HCQ ( $20 \mu\text{M}$ ).

## Reference

- S1. Ghoreishi, S.M., Attaran, A.M., Amin, A.M. and Khoobi, A., 2015. Multiwall carbon nanotube-modified electrode as a nanosensor for electrochemical studies and stripping voltammetric determination of an antimalarial drug. *RSC Advances*, 5(19), pp.14407-14415.
- S2. Mahnashi, H.M., Mahmoud, A.M., Alkahtani, A.S. and El-Wakil, M.M., 2021. Simultaneous electrochemical detection of azithromycin and hydroxychloroquine based on VS2 QDs embedded N, S@ graphene aerogel/cCNTs 3D nanostructure. *Microchemical Journal*, 163, p.105925.
- S3. Khoobi, A., Ghoreishi, S.M., Behpour, M., Shaterian, M. and Salavati-Niasari, M., 2014. Design and evaluation of a highly sensitive nanostructure-based surface modification of glassy carbon electrode for electrochemical studies of hydroxychloroquine in the presence of acetaminophen. *Colloids and Surfaces B: Biointerfaces*, 123, pp.648-656.
- S4. Deroco, P.B., Vicentini, F.C., Oliveira, G.G., Rocha-Filho, R.C. and Fatibello-Filho, O., 2014. Square-wave voltammetric determination of hydroxychloroquine in pharmaceutical and synthetic urine samples using a cathodically pretreated boron-doped diamond electrode. *Journal of Electroanalytical Chemistry*, 719, pp.19-23.
- S5. Khoobi, A., Ghoreishi, S.M. and Behpour, M., 2014. Sensitive and selective determination of hydroxychloroquine in the presence of uric acid using a new nanostructure self-assembled monolayer modified electrode: optimization by multivariate data analysis. *Analyst*, 139(16), pp.4064-4072.

- S6. George, J.M. and Mathew, B., 2021. Cyclodextrin-mediated gold nanoparticles as multisensing probe for the selective detection of hydroxychloroquine drug. *Korean Journal of Chemical Engineering*, 38(3), pp.624-634.
- S7. Deroco, P.B., Vicentini, F.C., Oliveira, G.G., Rocha-Filho, R.C. and Fatibello-Filho, O., 2014. Square-wave voltammetric determination of hydroxychloroquine in pharmaceutical and synthetic urine samples using a cathodically pretreated boron-doped diamond electrode. *Journal of Electroanalytical Chemistry*, 719, pp.19-23.
- S8. Baby, J.N., Sriram, B., Hsu, Y.F., Wang, S.F. and George, M., 2022. Construction of ANbO<sub>3</sub> (A= Na, K)/f-carbon nanofiber composite: Rapid and real-time electrochemical detection of hydroxychloroquine in environmental samples. *Environmental Research*, 215, p.114232.
